# Supplementary material for: A highly selective turn-on fluorescent chemosensor for Al3+ imaging in living cells via through-bond energy transfer
Source: Royal Society of Chemistry journal article supplement (doi:10.1039/c3ra43535k), 2013-01-01
Supplement: c3ra43535k.pdf [file c3ra43535k.pdf]

## A highly selective fluorescent chemosensor for Al<sup>3+</sup> imaging in living cells *via* through-bond energy transfer

Ruixue Kang, Xiangmin Shao, Fangfang Peng, Yuanlin Zhang, Guo-Tao Sun, Weili Zhao, Xin-Dong Jiang

|                          |   |
|--------------------------|---|
| 1. Fig. S1               | 2 |
| 2. Fig. S2               | 3 |
| 3. Fig. S3               | 4 |
| 4. Fig. S4               | 5 |
| 5. NMR of <b>PSI-BDP</b> | 6 |
| 6 HRMS of <b>PSI-BDP</b> | 8 |
| 7 Reference              | 9 |

1. Fig. S1

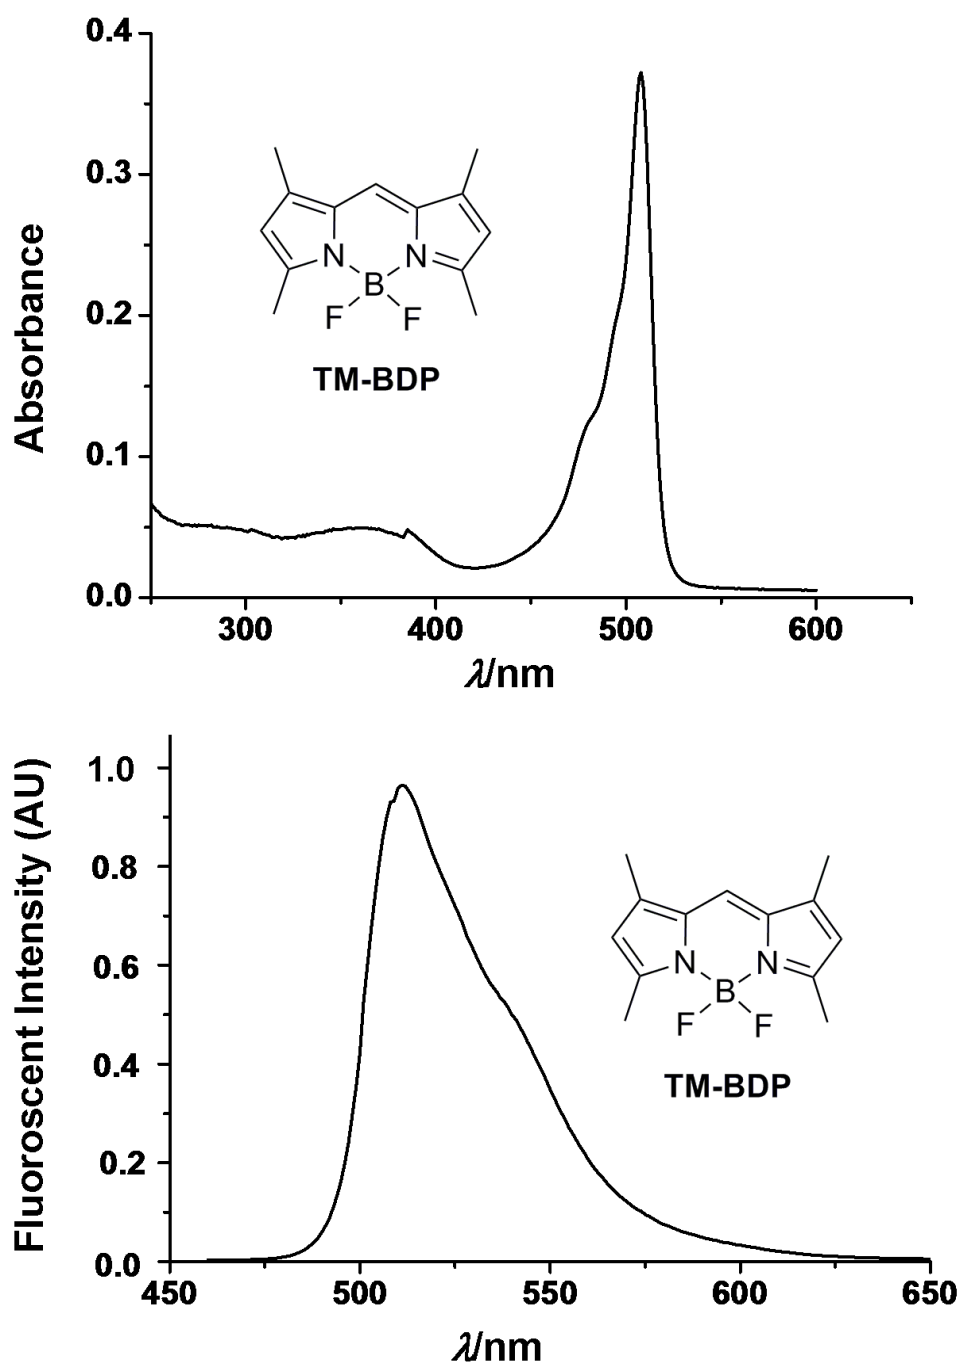

**Fig. S1** The spectra of absorption and fluorescence of **TM-BDP** ( $\lambda_{\text{abs}} = 508$  nm;  $\lambda_{\text{em}} = 511$  nm) in MeOH/H<sub>2</sub>O (v/v = 1: 1).

2. Fig. S2

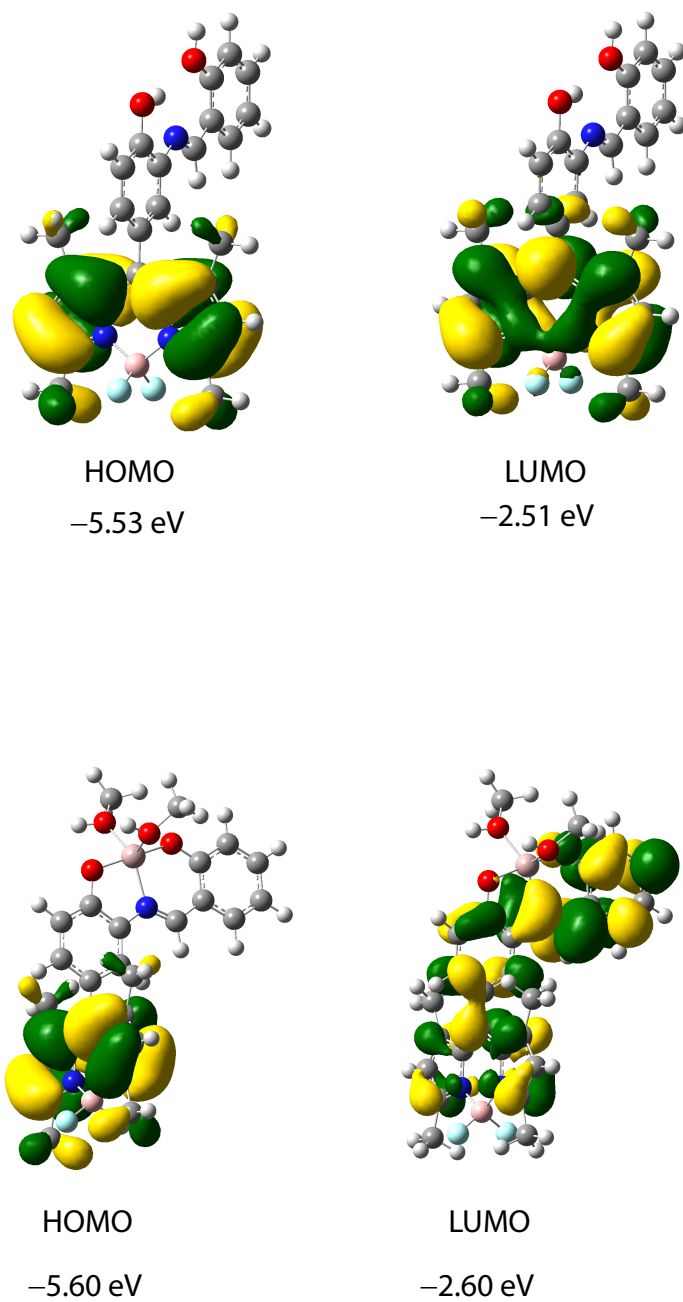

**Fig. S2** HOMO and LUMO of **PSI-BDP** (upper row) and **PSI-BDP+ Al<sup>3+</sup>** (bottom row). Calculated at B3LYP/6-31G(d) level with Gaussian 09W. MeOH was used as solvent.<sup>1</sup>

3. Fig. S3

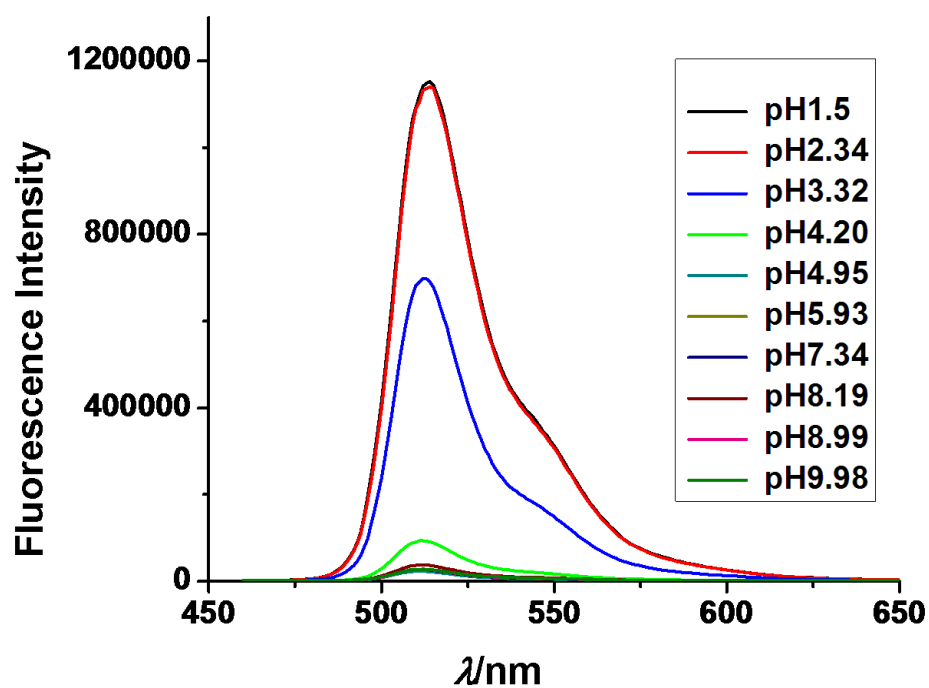

**Fig. S3** Effect of pH on fluorescence intensity of **PSI-BDP** (1 μM) in MeOH/H<sub>2</sub>O (v/v = 1:1).  $\lambda_{em} = 513$  nm.  $\lambda_{ex} = 450$  nm.

#### 4. Fig. S4

Print of window 80: MS Spectrum

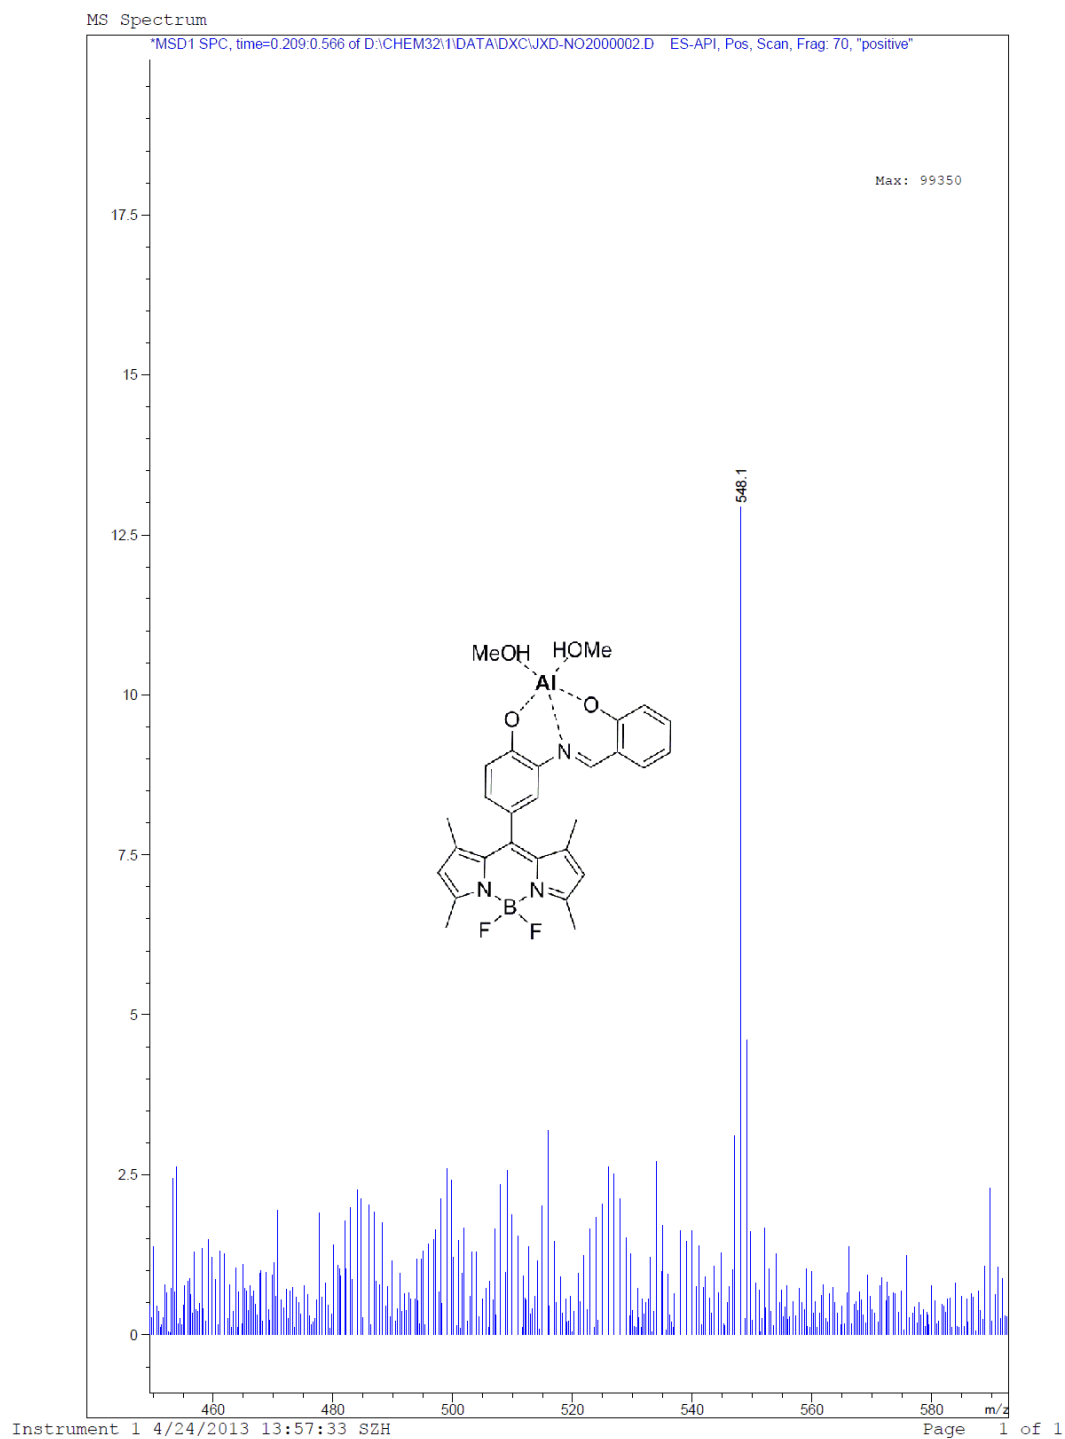

**Fig. S4** Positive-ion electrospray ionization mass spectrum of **PSI-BDP** upon addition of  $\text{Al}(\text{NO}_3)_3$  (1 equiv) in  $\text{CH}_3\text{OH}$ .

## 5. NMR of PSI-BDP

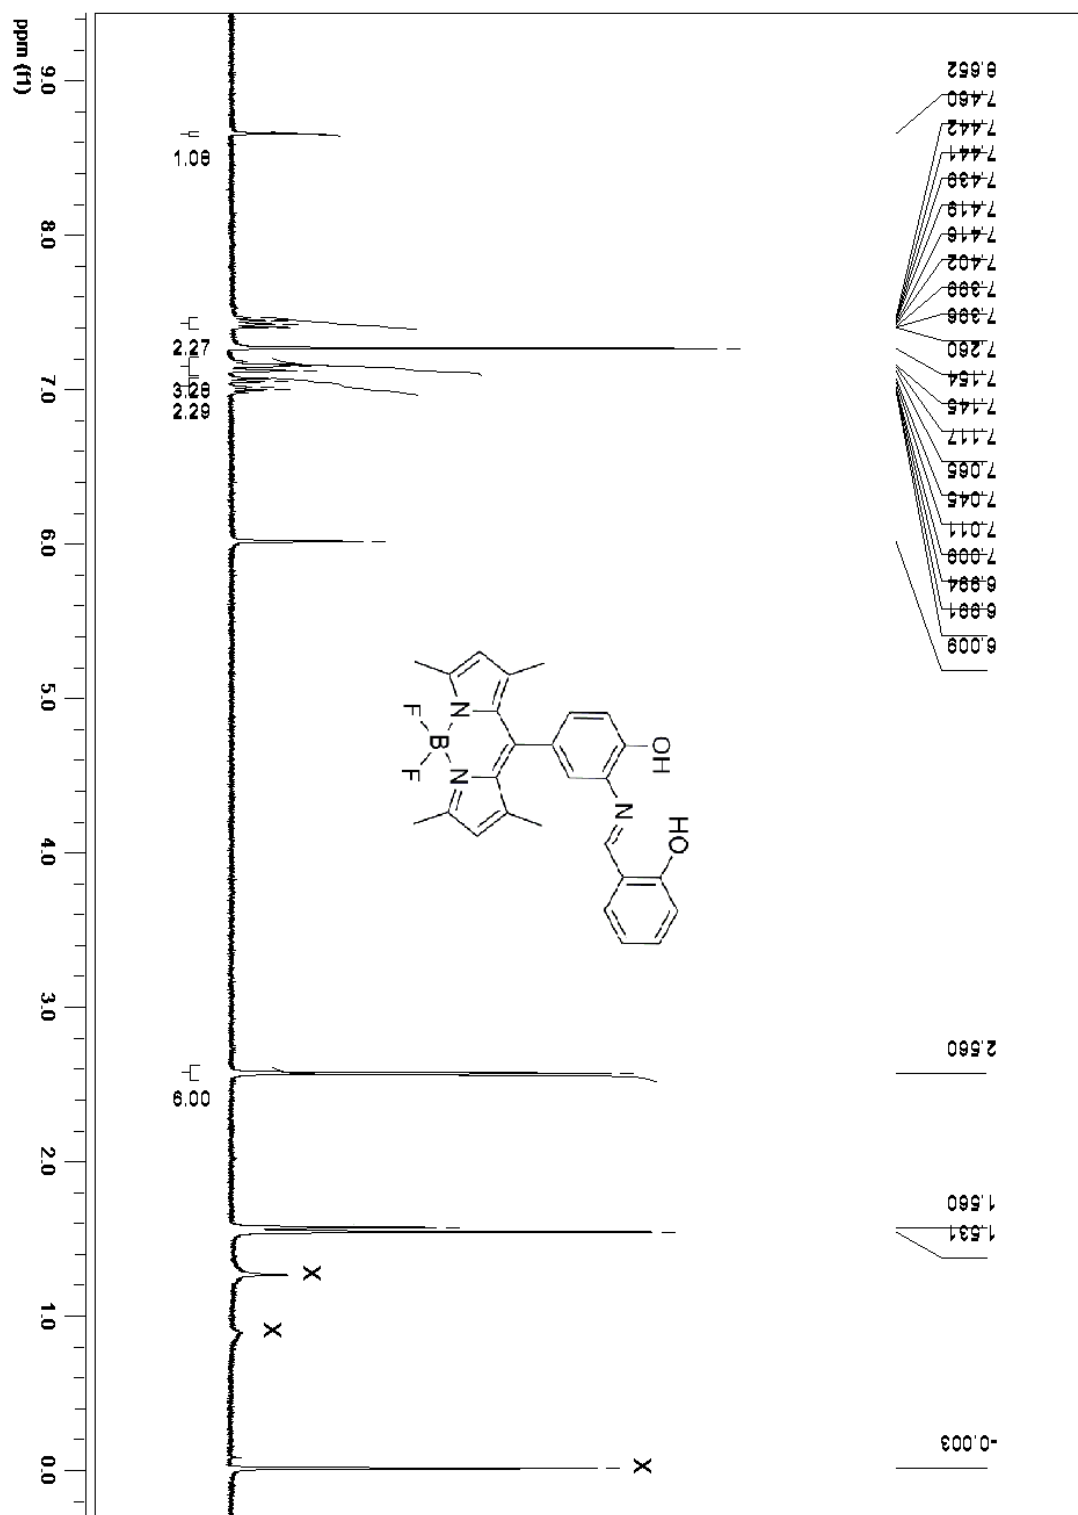

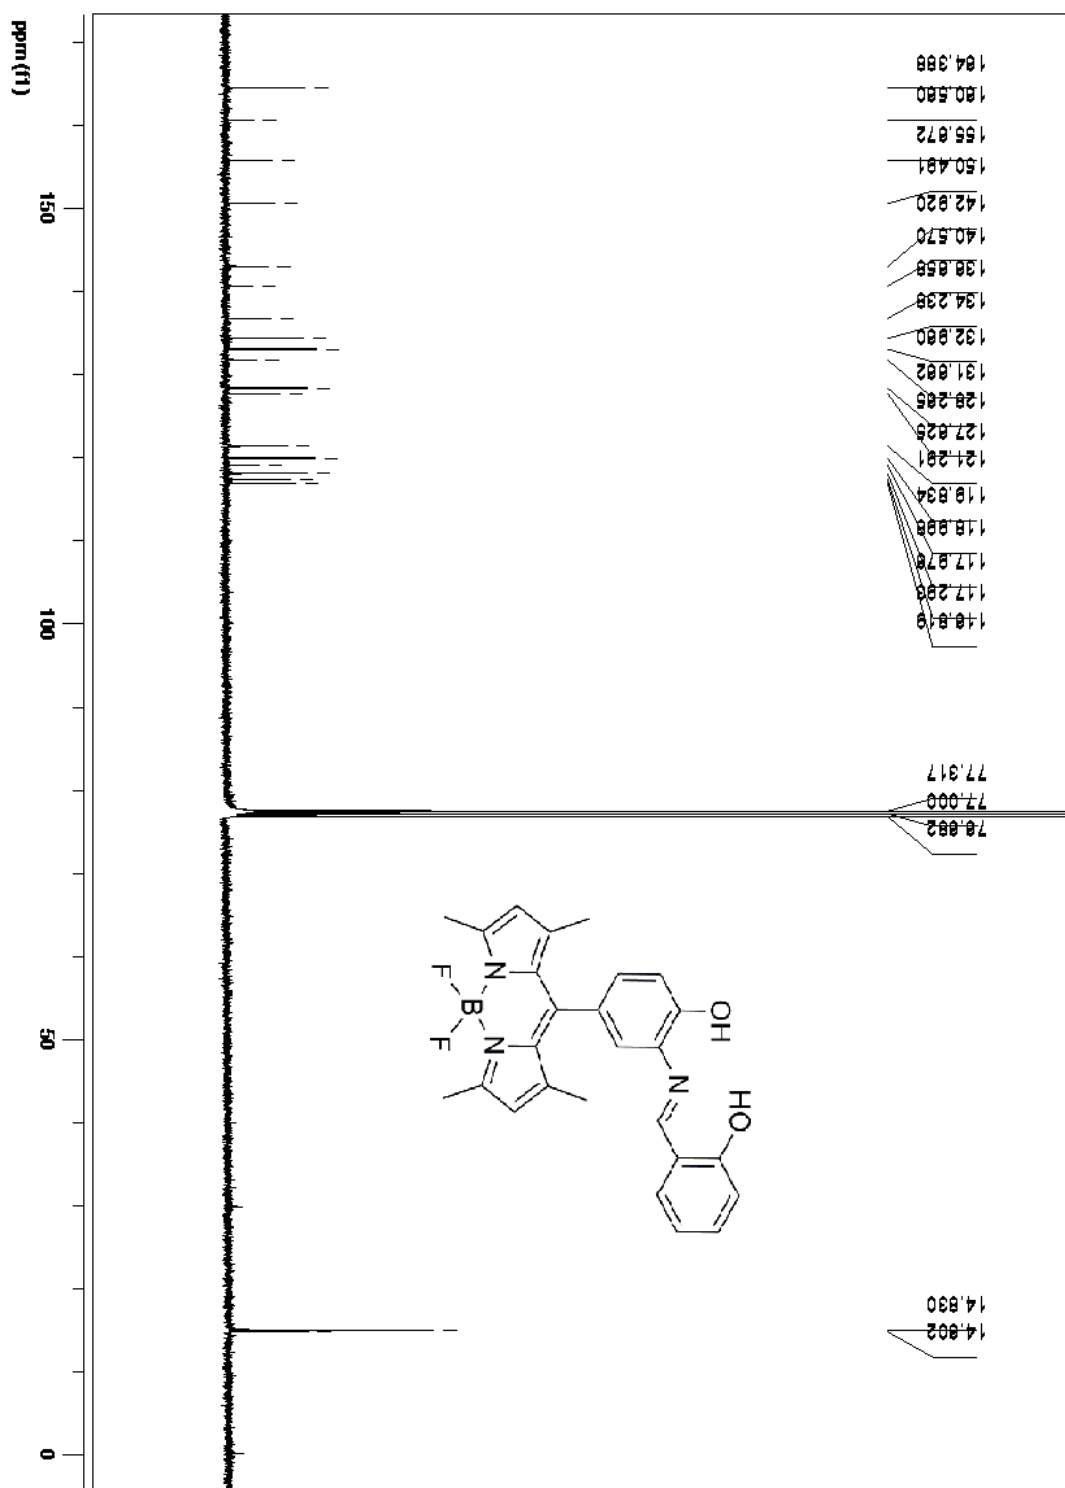

$^{13}\text{C}$  NMR of PSI-BDP

## 6. HRMS of PSI-BDP

### Peking University Mass Spectrometry Sample Analysis Report

|                  |                            |
|------------------|----------------------------|
| Analysis Info    |                            |
| Analysis Name    | 13040185_20130410_000008.d |
| Sample           | BDP                        |
| Comment          | ESI Positive               |
| Acquisition Date | 4/10/2013 3:17:56 PM       |
| Instrument       | Bruker Apex IV FTMS        |
| Operator         | Peking University          |

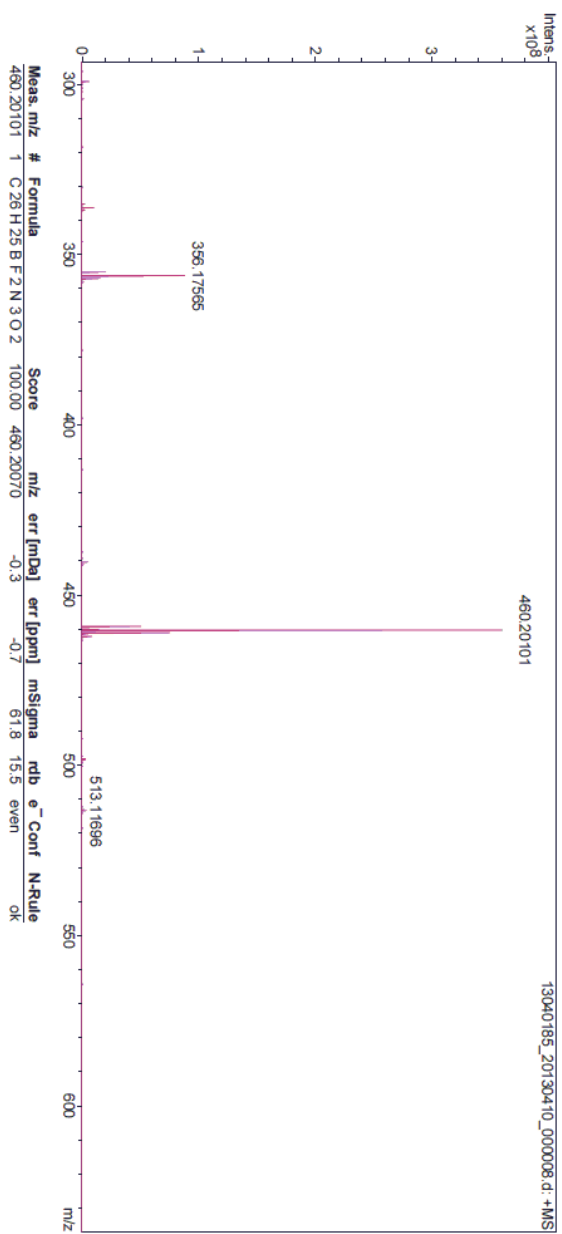



## 7 References

1. M. J. Frisch, G. W. Trucks, H. B. Schlegel, G. E. Scuseria, M. A. Robb, J. R. Cheeseman, G. Scalmani, V. Barone, B. Mennucci, G. A. Petersson, H. Nakatsuji, M. Caricato, X. Li, H. P. Hratchian, A. F. Izmaylov, J. Bloino, G. Zheng, J. L. Sonnenberg, M. Hada, M. Ehara, K. Toyota, R. Fukuda, J. Hasegawa, M. Ishida, T. Nakajima, Y. Honda, O. Kitao, H. Nakai, T. Vreven, J. A., Jr. Montgomery, J. E. Peralta, F. Ogliaro, M. Bearpark, J. J. Heyd, E. Brothers, K. N. Kudin, V. N. Staroverov, R. Kobayashi, J. Normand, K. Raghavachari, A. Rendell, J. C. Burant, S. S. Iyengar, J. Tomasi, M. Cossi, N. Rega, J. M. Millam, M. Klene, J. E. Knox, J. B. Cross, V. Bakken, C. Adamo, J. Jaramillo, R. Gomperts, R. E. Stratmann, O. Yazyev, A. J. Austin, R. Cammi, C. Pomelli, J. W. Ochterski, R. L. Martin, K. Morokuma, V. G. Zakrzewski, G. A. Voth, P. Salvador, J. J. Dannenberg, S. Dapprich, A. D. Daniels, Ö. Farkas, J. B. Foresman, J. V. Ortiz, J. Cioslowski and D. J. Fox, *Gaussian 09W*, revision A.1; Gaussian Inc.: Wallingford, CT, 2009.
